# Supplementary material for: DLL3 Is a Prognostic and Potentially Predictive Biomarker for Immunotherapy Linked to PD/PD-L Axis and NOTCH1 in Pancreatic Cancer
Source: MDPI journal article supplement (doi:10.3390/biomedicines11102812), 2023-10-17
Supplement: s1 [file s1]

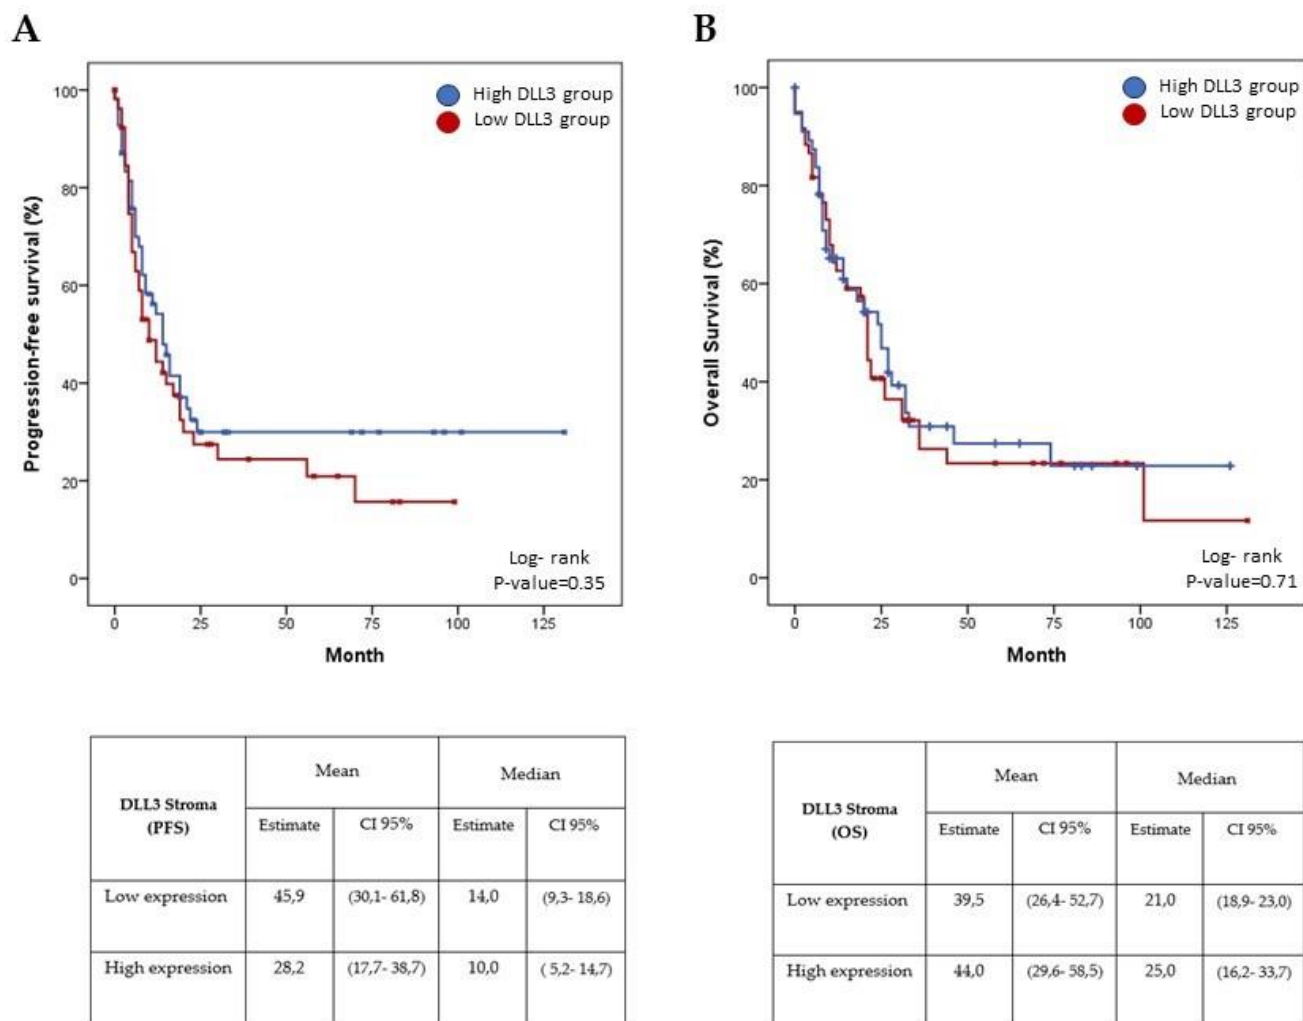

**Supplementary Figure S1.** Survival analyses according to DLL3 protein expression in stroma tissues. **(A)** Progression-free survival analysis according to DLL3 protein expression. **(B)** Overall survival analysis according to DLL3 protein expression. The blue lines denote the high DLL3 expression arm. The red lines correspond to the low DLL3 expression patients.
